# Supplementary material
Source: publisher figshare collection journal article supplement (https://gsajournals.figshare.com/ndownloader/files/27382568)
Supplement: Supplementary file 1 [file 27382568]

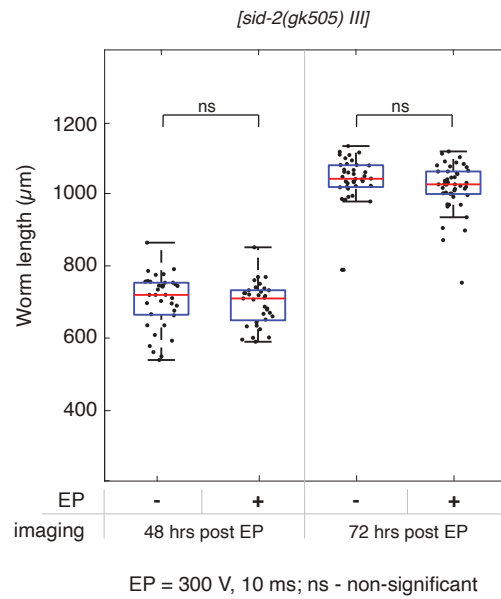

**Figure S5.** Comparison of body lengths of electroporated and untreated VC1119 *[sid-2(gk505) III]* worms.

Electroporation was performed in the absence of any dsRNA. The worms were imaged 48 hours and 72 hours post electroporation. No significant difference in length of electroporated and untreated worms was observed (ANOVA test with Bonferroni correction).
